# Supplementary material for: Non-productive binding of cellobiohydrolase i investigated by surface plasmon resonance spectroscopy
Source: Springer Nature journal article supplement (doi:10.1007/s10570-021-04002-6), 2021-08-25
Supplement: MOESM1 [file 19599920]

# Non-Productive Binding of Cellobiohydrolase I Investigated by Surface Plasmon Resonance Spectroscopy

## Supplemental Information

Florian Csarman<sup>1</sup>, Claudia Gusenbauer<sup>2</sup>, Lena Wohlschlager<sup>1</sup>, Gijs van Erven<sup>3</sup>, Mirjam A. Kabel<sup>3</sup>, Johannes Konnerth<sup>2</sup>, Antje Potthast<sup>4</sup>, Roland Ludwig<sup>1\*</sup>

<sup>1</sup> Department of Food Science and Technology, Biocatalysis and Biosensing Laboratory, BOKU University of Natural Resources and Life Sciences, Muthgasse 18, 1190 Vienna, Austria

<sup>2</sup> Department of Materials Sciences and Process Engineering, Institute of Wood Technology and Renewable Materials, BOKU - University of Natural Resources and Life Sciences, Konrad-Lorenz-Straße 24, 3430, Tulln, Austria

<sup>3</sup> Laboratory of Food Chemistry, Wageningen University & Research, Bornse Weiland 9, 6708 WG Wageningen, The Netherlands

<sup>4</sup> Department of Chemistry, Division of Chemistry of Renewable Resources, BOKU - University of Natural Resources and Life Sciences, Konrad-Lorenz-Straße 24, A-3430 Tulln, Austria

Florian Csarman: [florian.csarman@boku.at](mailto:florian.csarman@boku.at)

Claudia Gusenbauer: [claudia.gusenbauer@boku.ac.at](mailto:claudia.gusenbauer@boku.ac.at)

Lena Wohlschlager: [lena.wohlschlager@boku.ac.at](mailto:lena.wohlschlager@boku.ac.at)

Mirjam A. Kabel: [mirjam.kabel@wur.nl](mailto:mirjam.kabel@wur.nl)

Antje Potthast: [antje.potthast@boku.ac.at](mailto:antje.potthast@boku.ac.at)

\*Roland Ludwig: [roland.ludwig@boku.ac.at](mailto:roland.ludwig@boku.ac.at)

\*corresponding author

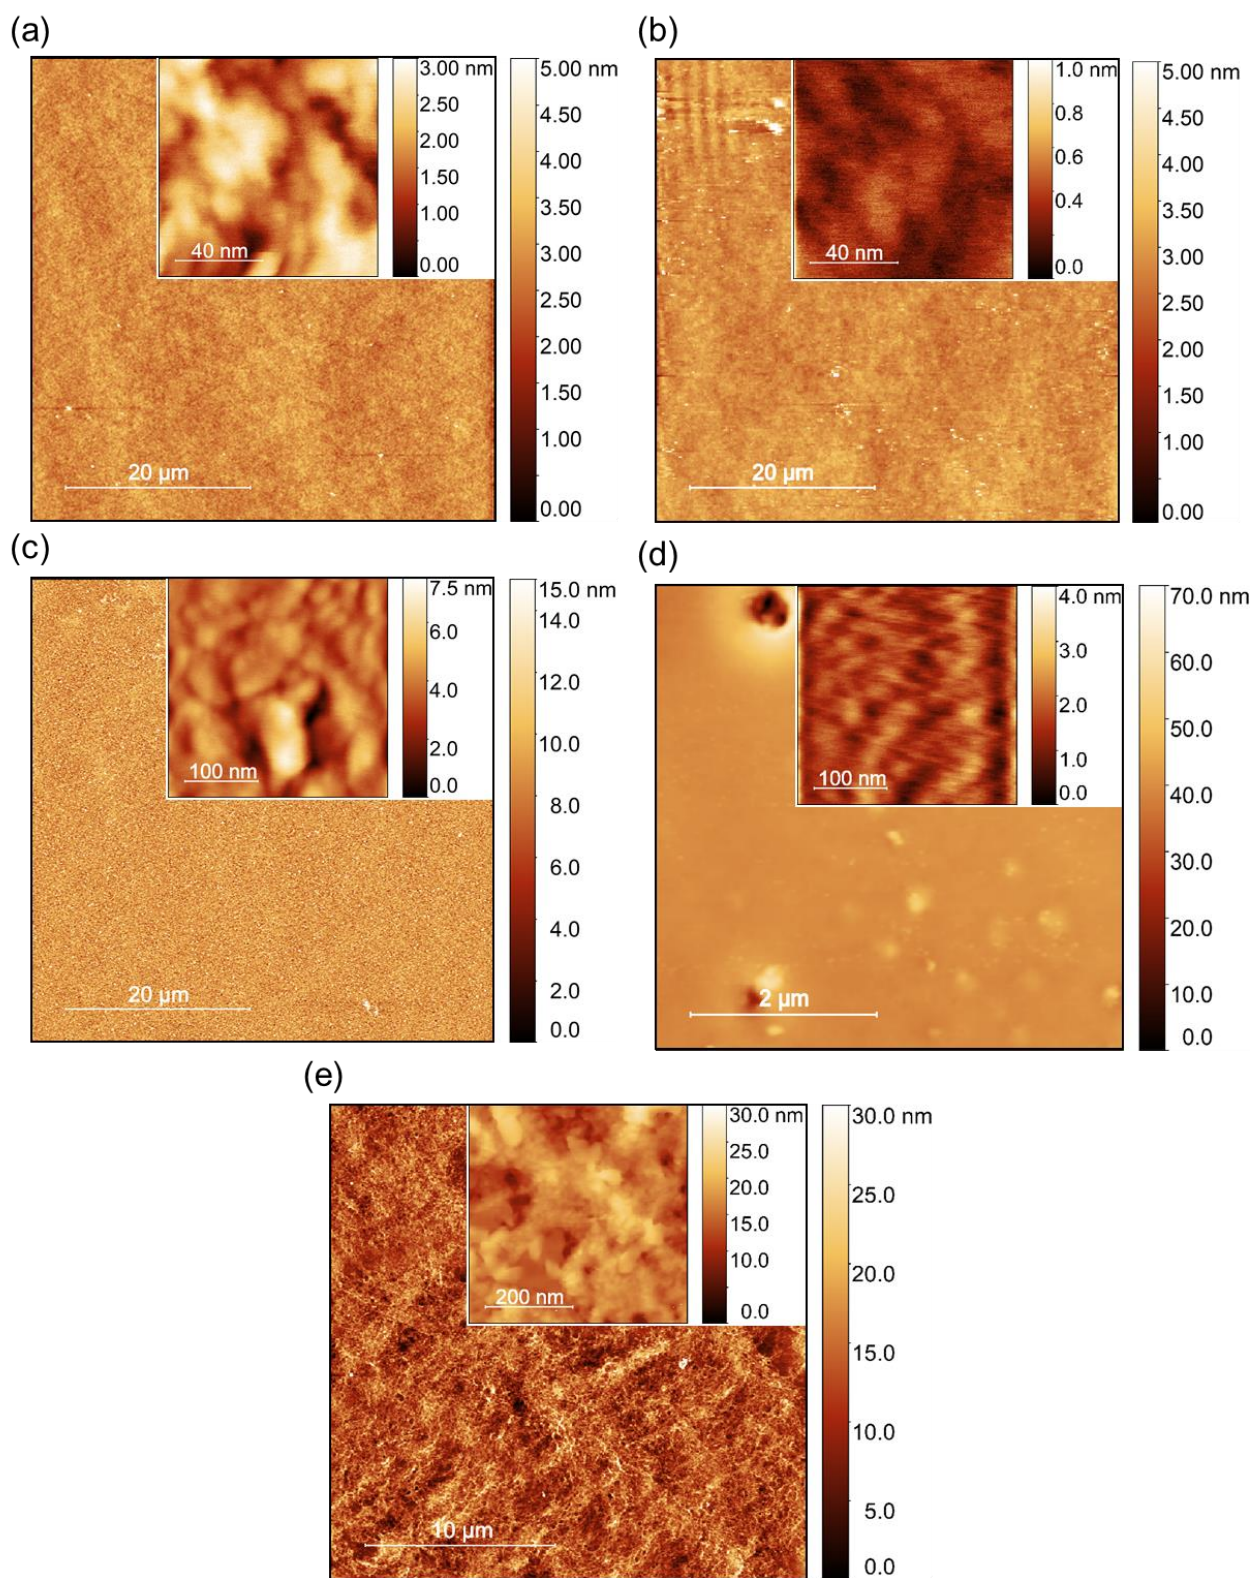

**Fig. S1:** AFM images of piranha solution treated gold surface (a) and glass surface (b), PDADMAC (c) or polystyrene (d) coated gold surface and cellulose modified gold surface (e).

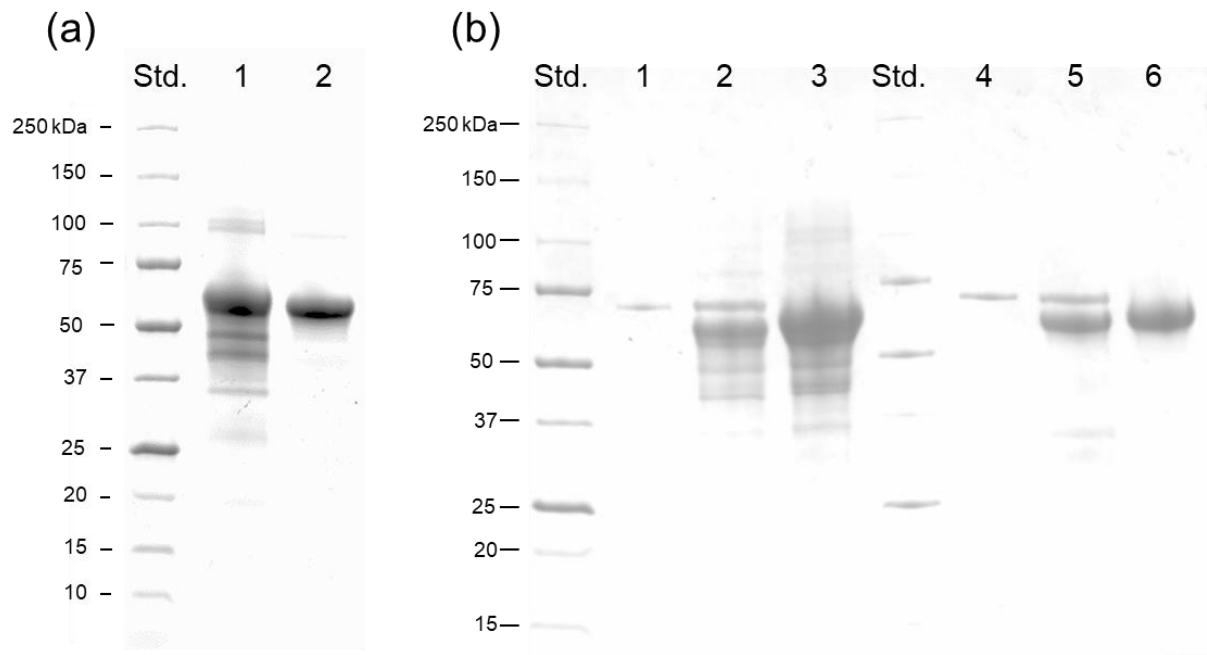

**Fig. S2:** SDS-PAGE of the purification of CBHI (a) showing Celluclast (lane 1) and purified CBHI (lane 2) and of the deglycosylation using Endo Hf (b) showing pure Endo-Hf (lane 1 and 4), deglycosylated Celluclast (lane 2) untreated Celluclast (lane 3) deglycosylated CBHI (lane 5) and untreated CBHI (lane 6).

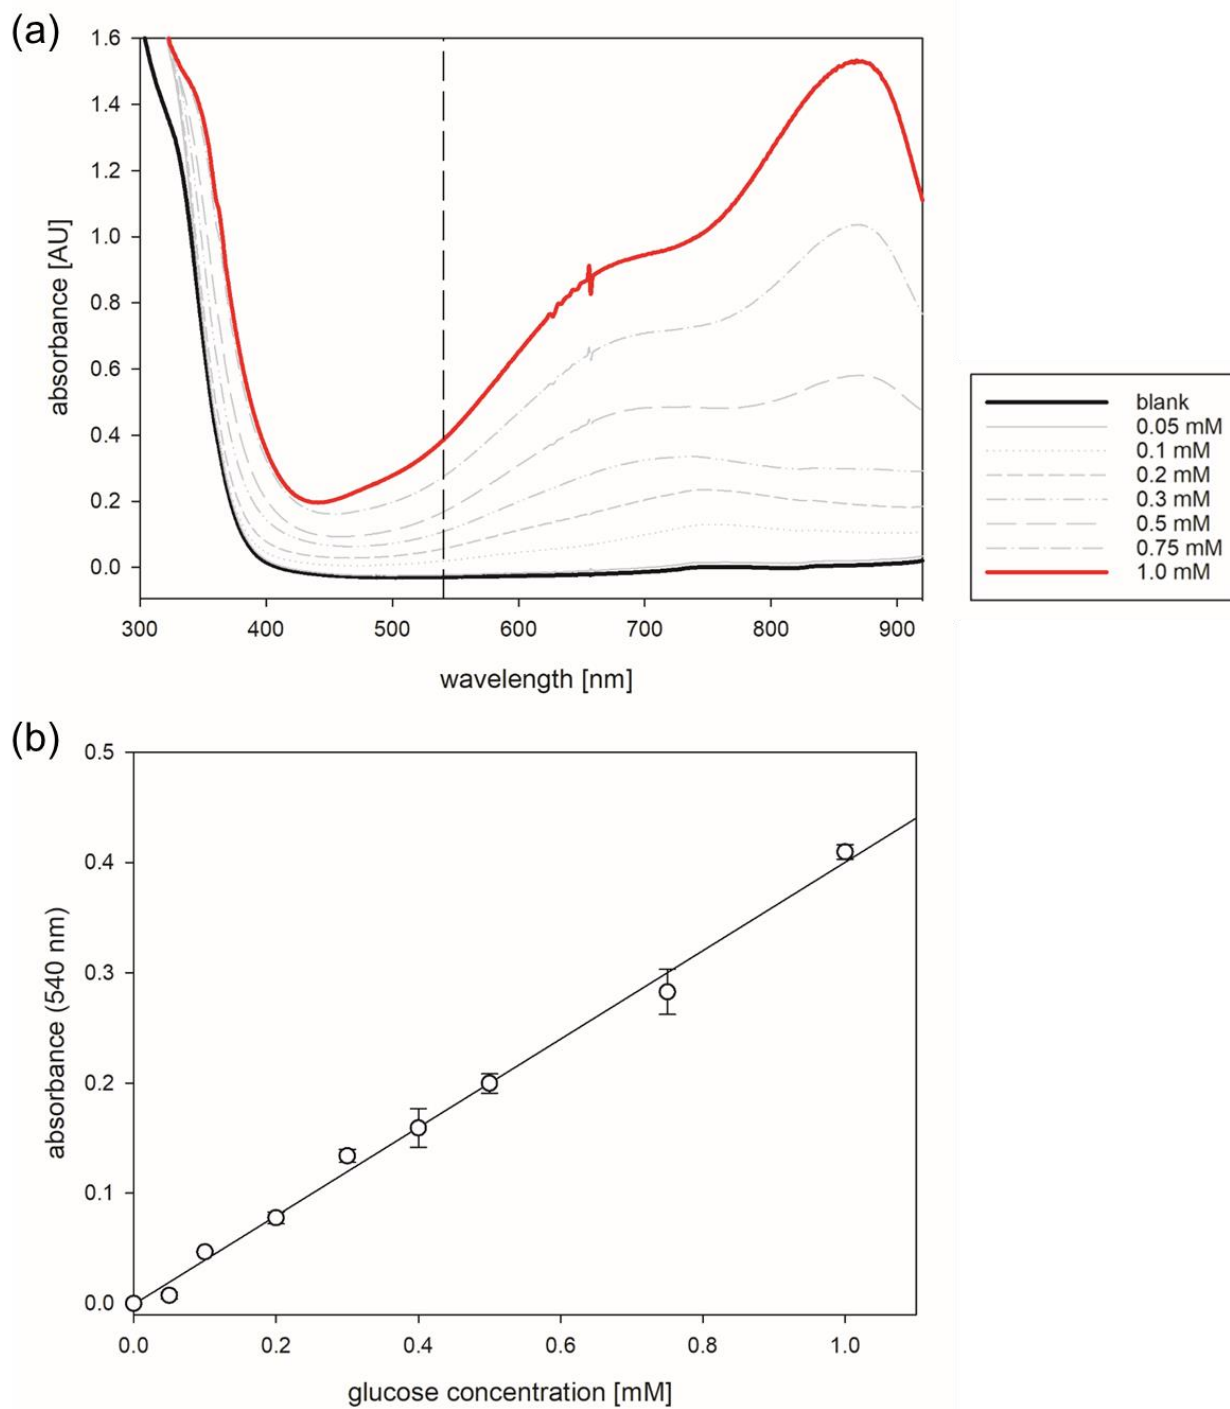

**Fig. S3:** Calibration curve for the determination of reducing sugars using the Nelson-Somogyi assay. Glucose standards from 0.05 mM to 1.0 mM were used and spectra were recorded from 300 to 900 nm (a). The absorbance at 540 nm was used for quantitation (b). Measurements were performed in triplicates.

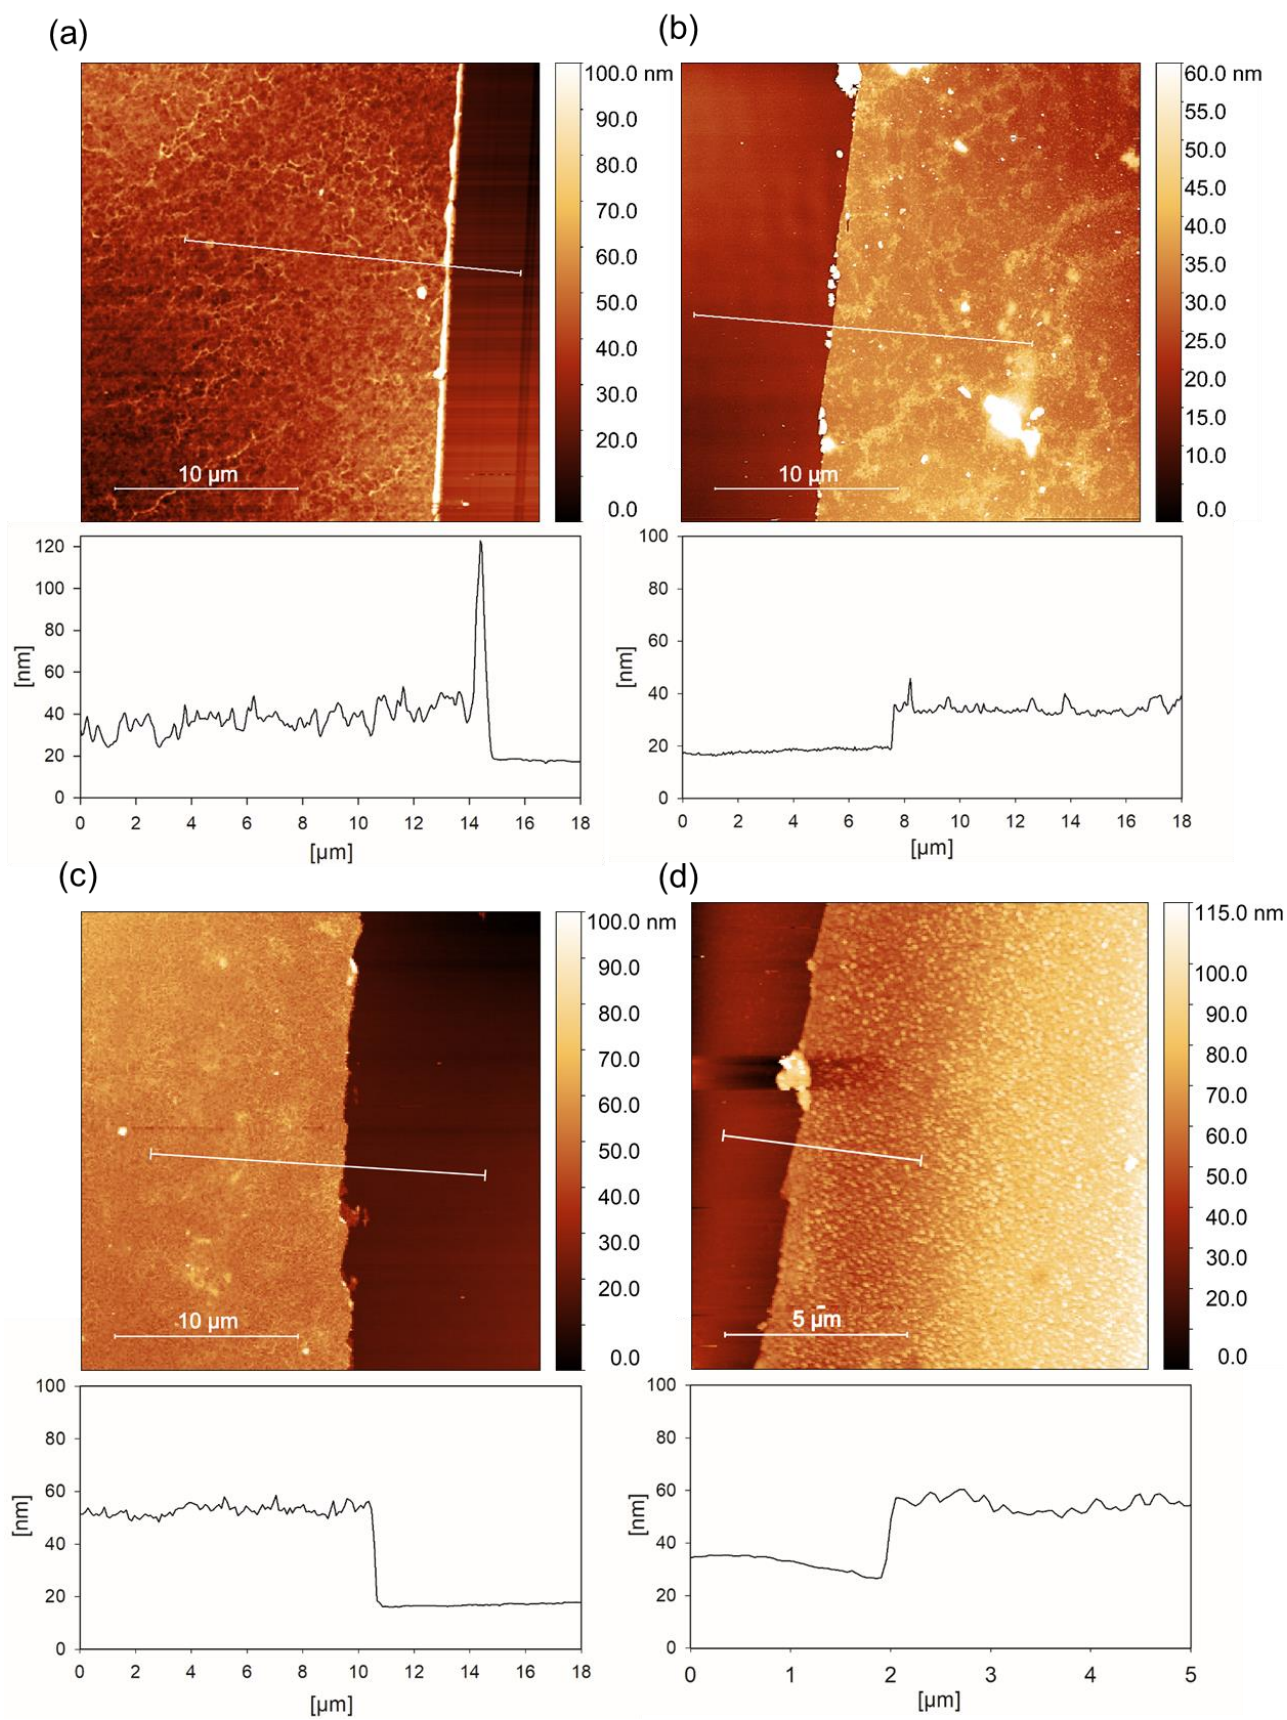

**Fig. S4:** Determination of height-profiles by AFM for the evaluation of the thickness of cellulose films on gold (a), cellulose films on glass (c) and lignin films on gold prepared from MWL (b) and OSL (d).

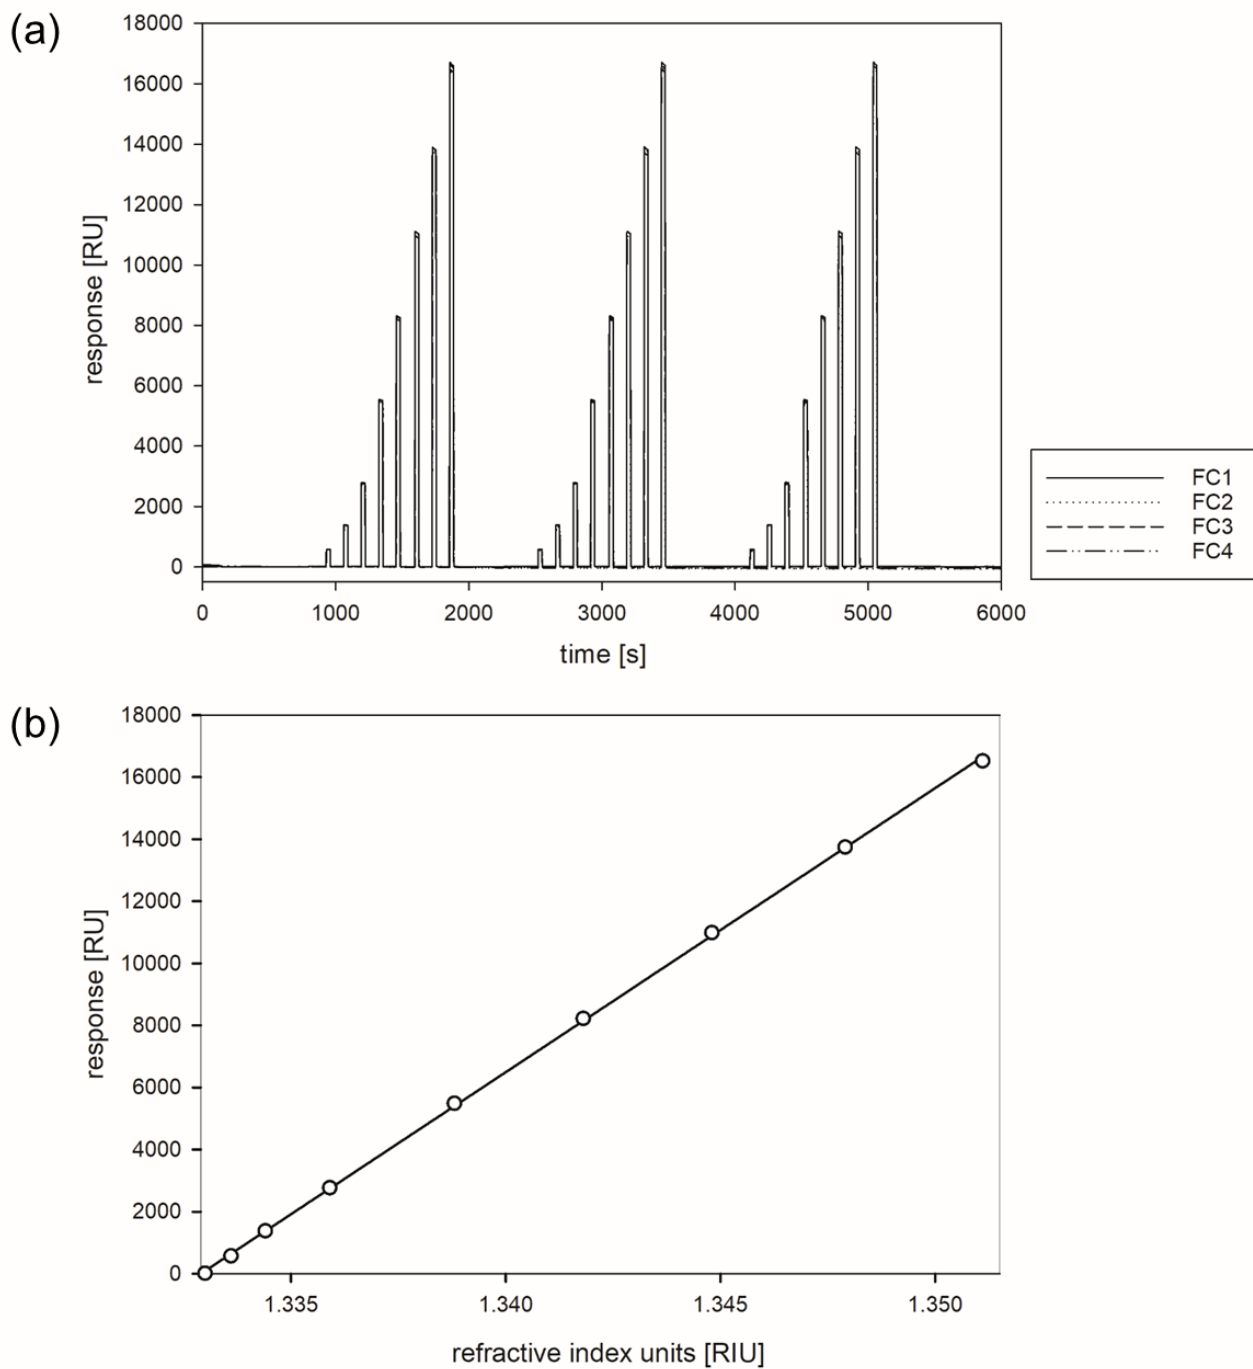

**Fig. S5:** Determination of sensitivity factor for the quantification of adsorbed mass to the sensor surface. Experiments were performed on four flow channels (a). Glycerol solutions (0, 0.5, 1.25, 2.5, 5.0, 7.5, 10, 12.5, and 15 % wt.) with known refractive index ( $\eta$ ) for the determination of the standard curve (b). All standard errors were below 1%.

**Table SI 1:** Preparation procedures and characterization of cellulose and lignin model films prepared by spin coating techniques.

|                 | Cellulose source                      | Method of deposition                  | Substrate | Film thickness [nm] | RMS roughness [nm] | Contact angle [deg] |                                | Surface free energy [mN m <sup>-1</sup> ] |       |           | Reference                 |
|-----------------|---------------------------------------|---------------------------------------|-----------|---------------------|--------------------|---------------------|--------------------------------|-------------------------------------------|-------|-----------|---------------------------|
|                 |                                       |                                       |           |                     |                    | Water               | CH <sub>2</sub> I <sub>2</sub> | Total                                     | Polar | Disperse  |                           |
|                 |                                       |                                       |           |                     |                    |                     |                                |                                           |       |           |                           |
| Cellulose       | Avicel                                | dissolution in DMAc/LiCl              | silica    | 28                  | 4.8                | 33                  | n.d.                           | n.d.                                      | n.d.  | n.d.      | (Eriksson et al. 2005)    |
|                 | cellulose xanthate                    | regeneration from cellulose xanthate  | gold      | 20 - 407            | 4.5 - 5.6          | 30 - 37             | 32 - 34                        | 66.8                                      | 42.5  | 23.1      | (Weißl et al. 2018)       |
|                 | trimethylsilylcellulose               | regeneration from TMSC                | silica    | 24                  | 0.78               | 51.5                | n.d.                           | 60.2                                      | n.d.  | n.d.      | (Mohan et al. 2011)       |
|                 | trimethylsilylcellulose               | regeneration from TMSC                | gold      | 19.5                | 3                  |                     |                                |                                           |       |           | (Kontturi et al. 2003)    |
|                 | Avicel                                | dissolution in DMAc/LiCl              | silica    | 0.5 - 10            | < 2                | 25-35               | n.d.                           | n.d.                                      | n.d.  | n.d.      | (Szech and Riegler 2006)  |
|                 | MCC (Merck)                           | MCC dissolved in DMAc/LiCl            | gold      | 24.9                | 5.6                | 30.5                | 45.1                           | 67.1                                      | 30.4  | 36.7      | this work                 |
|                 | MCC (Merck)                           | MCC dissolved in DMAc/LiCl            | glass     | 29.8                | 5.4                | 30                  | 43.3                           | 67.1                                      | 39.0  | 27.8      | this work                 |
|                 | Lignin source                         | Method of deposition                  | Substrate | Film thickness [nm] | RMS roughness [nm] | Contact angle [deg] |                                | Surface free energy [mN m <sup>-1</sup> ] |       |           | Reference                 |
|                 |                                       |                                       |           |                     |                    | Water               | CH <sub>2</sub> I <sub>2</sub> | Total                                     | Polar | Disperse  |                           |
|                 |                                       |                                       |           |                     |                    |                     |                                |                                           |       |           |                           |
| Lignin          | MWL from eucalyptus                   | dissolution in dioxane/water          | gold      | 9                   | 4.15               | 66                  | n.d.                           | n.d.                                      | n.d.  | n.d.      | (Pereira et al. 2017)     |
|                 | MWL from wheat straw                  | dissolution in dioxane/water          | gold      | 9                   | 2.14               | 69                  | n.d.                           | n.d.                                      | n.d.  | n.d.      | (Pereira et al. 2017)     |
|                 | Kraft lignin fom softwood             | dissolution in 1 M NH <sub>4</sub> OH | silica    | 6.9                 | 1.2                | 54                  | n.d.                           | n.d.                                      | n.d.  | n.d.      | (Pereira et al. 2017)     |
|                 | OSL from beech wood                   | dissolution in 1 M NH <sub>4</sub> OH | silica    | n.d.                | 1.5                | 58                  | n.d.                           | n.d.                                      | n.d.  | n.d.      | (Borrega et al. 2020)     |
|                 | soda lignin from wheat straw          | dissolution in 1 M NH <sub>4</sub> OH | silica    | 11.3                | 1.6                | 43                  | n.d.                           | n.d.                                      | n.d.  | n.d.      | (Borrega et al. 2020)     |
|                 | soda oxidized lignin from wheat straw | dissolution in 1 M NH <sub>4</sub> OH | silica    | 9.5                 | 0.5                | n.d.                | n.d.                           | n.d.                                      | n.d.  | n.d.      | (Borrega et al. 2020)     |
|                 | lignosulfonate from softwood          | dissolution in 1 M NH <sub>4</sub> OH | silica    | 5.3                 | 0.9                | n.d.                | n.d.                           | n.d.                                      | n.d.  | n.d.      | (Borrega et al. 2020)     |
|                 | Ecohelix                              | dissolution in 1 M NH <sub>4</sub> OH | silica    | 6.3                 | 0.5                | n.d.                | n.d.                           | n.d.                                      | n.d.  | n.d.      | (Borrega et al. 2020)     |
|                 | Kraft lignin from spruce              | dissolution in 1 M NH <sub>4</sub> OH | silica    | 50-60               | 0.93               | 46                  | 51                             | 57.1                                      | 23.4  | 33.7      | (Notley and Norgren 2010) |
|                 | MWL pine                              | dissolution in acetone/ water (9:1)   | silica    | 30-60               | 1.31               | 52.5                | 23                             | 58.8                                      | 14.3  | 44.5      | (Notley and Norgren 2010) |
|                 | MWL eucalyptus                        | dissolution in acetone/ water (9:1)   | silica    | 30-60               | 1.38               | 55.5                | 27                             | 57                                        | 13.1  | 43.9      | (Notley and Norgren 2010) |
|                 | Kraft lignin from softwood            | dissolution in dioxane/water (9:1)    | silica    | 23.1 – 104.6        | 1.01 – 1.39        | 46                  | n.d.                           | n.d.                                      | n.d.  | n.d.      | (Norgren et al. 2006)     |
|                 | OSL from beech wood                   | dissolution in dioxane/water          | gold      | 23.2                | 4.4                | 67.6                | 34.2                           | 49.9                                      | 7.5   | 42.4      | this work                 |
|                 | MWL from spruce                       | dissolution in dioxane/water          | gold      | 14.6                | 8.3                | 68.3                | 41.6                           | 45.0                                      | 6.2   | 38.8      | this work                 |
|                 | OSL from beech wood                   | dissolution in dioxane/water          | glass     | n.d.                | n.d.               | 64                  | 39.6                           | 49.9                                      | 10    | 40        | this work                 |
| MWL from spruce | dissolution in dioxane/water          | glass                                 | n.d.      | n.d.                | 62.2               | 37.2                | 49.5                           | 8.5                                       | 41    | this work |                           |

# References

- Borrega M, Päärnilä S, Greca LG, Jääskeläinen AS, Ohra-Aho T, Rojas OJ, Tamminen T (2020) Morphological and wettability properties of thin coating films produced from technical lignins. *Langmuir* 36:9675–9684 . <https://doi.org/10.1021/acs.langmuir.0c00826>
- Eriksson J, Malmsten M, Tiberg F, Hønger T (2005) Enzymatic degradation of model cellulose films. 284:99–106 . <https://doi.org/10.1016/j.jcis.2004.10.041>
- Kontturi E, Thüne PC, Niemantsverdriet JW (2003) Novel method for preparing cellulose model surfaces by spin coating. *Polymer (Guildf)* 44:3621–3625 . [https://doi.org/10.1016/S0032-3861\(03\)00283-0](https://doi.org/10.1016/S0032-3861(03)00283-0)
- Mohan T, Kargl R, Doliška A, Vesel A, Köstler S, Ribitsch V, Stana-Kleinschek K (2011) Wettability and surface composition of partly and fully regenerated cellulose thin films from trimethylsilyl cellulose. *J Colloid Interface Sci* 358:604–610 . <https://doi.org/10.1016/j.jcis.2011.03.022>
- Norgren M, Notley SM, Majtnerova A, Gellerstedt G (2006) Smooth model surfaces from lignin derivatives. I. Preparation and characterization. *Langmuir* 22:1209–1214 . <https://doi.org/10.1021/la052284c>
- Notley SM, Norgren M (2010) Surface energy and wettability of spin-coated thin films of lignin isolated from wood. *Langmuir* 26:5484–5490 . <https://doi.org/10.1021/la1003337>
- Pereira A, Hoeger IC, Ferrer A, Rencoret J, Del Rio JC, Kruus K, Rahikainen J, Kellock M, Gutiérrez A, Rojas OJ, Rio JC, Kruus K, Rahikainen J, Kellock M, Gutie A, Rojas OJ, Del Rio JC, Kruus K, Rahikainen J, Kellock M, Gutiérrez A, Rojas OJ (2017) Lignin Films from Spruce, Eucalyptus, and Wheat Straw Studied with Electroacoustic and Optical Sensors: Effect of Composition and Electrostatic Screening on Enzyme Binding. *Biomacromolecules* 18:1322–1332 . <https://doi.org/10.1021/acs.biomac.7b00071>
- Sczech R, Riegler H (2006) Molecularly smooth cellulose surfaces for adhesion studies. *J Colloid Interface Sci* 301:376–385 . <https://doi.org/10.1016/j.jcis.2006.05.021>
- Weißl M, Niegelhell K, Reishofer D, Zankel A, Innerlohinger J, Spirk S (2018) Homogeneous cellulose thin films by regeneration of cellulose xanthate: properties and characterization. *Cellulose* 25:711–721 . <https://doi.org/10.1007/s10570-017-1576-3>
